# Supplementary material for: Prediction of hepatic metastasis and relapse in colorectal cancers based on concordance analyses with liver fibrosis scores
Source: PubMed Central journal article supplement (PMC7002812; doi:10.1186/s40169-020-0264-3), 2020-02-05

**Figure S1. Liver fibrosis score in NFS, FIB4, APRI measured by Kaplan-Meier survival for OS in the discovery cohort.**

A1: original NFS score, A2: modified NFS score; B1: original FIB4 score, B2: modified FIB4 score;

C: APRI score;

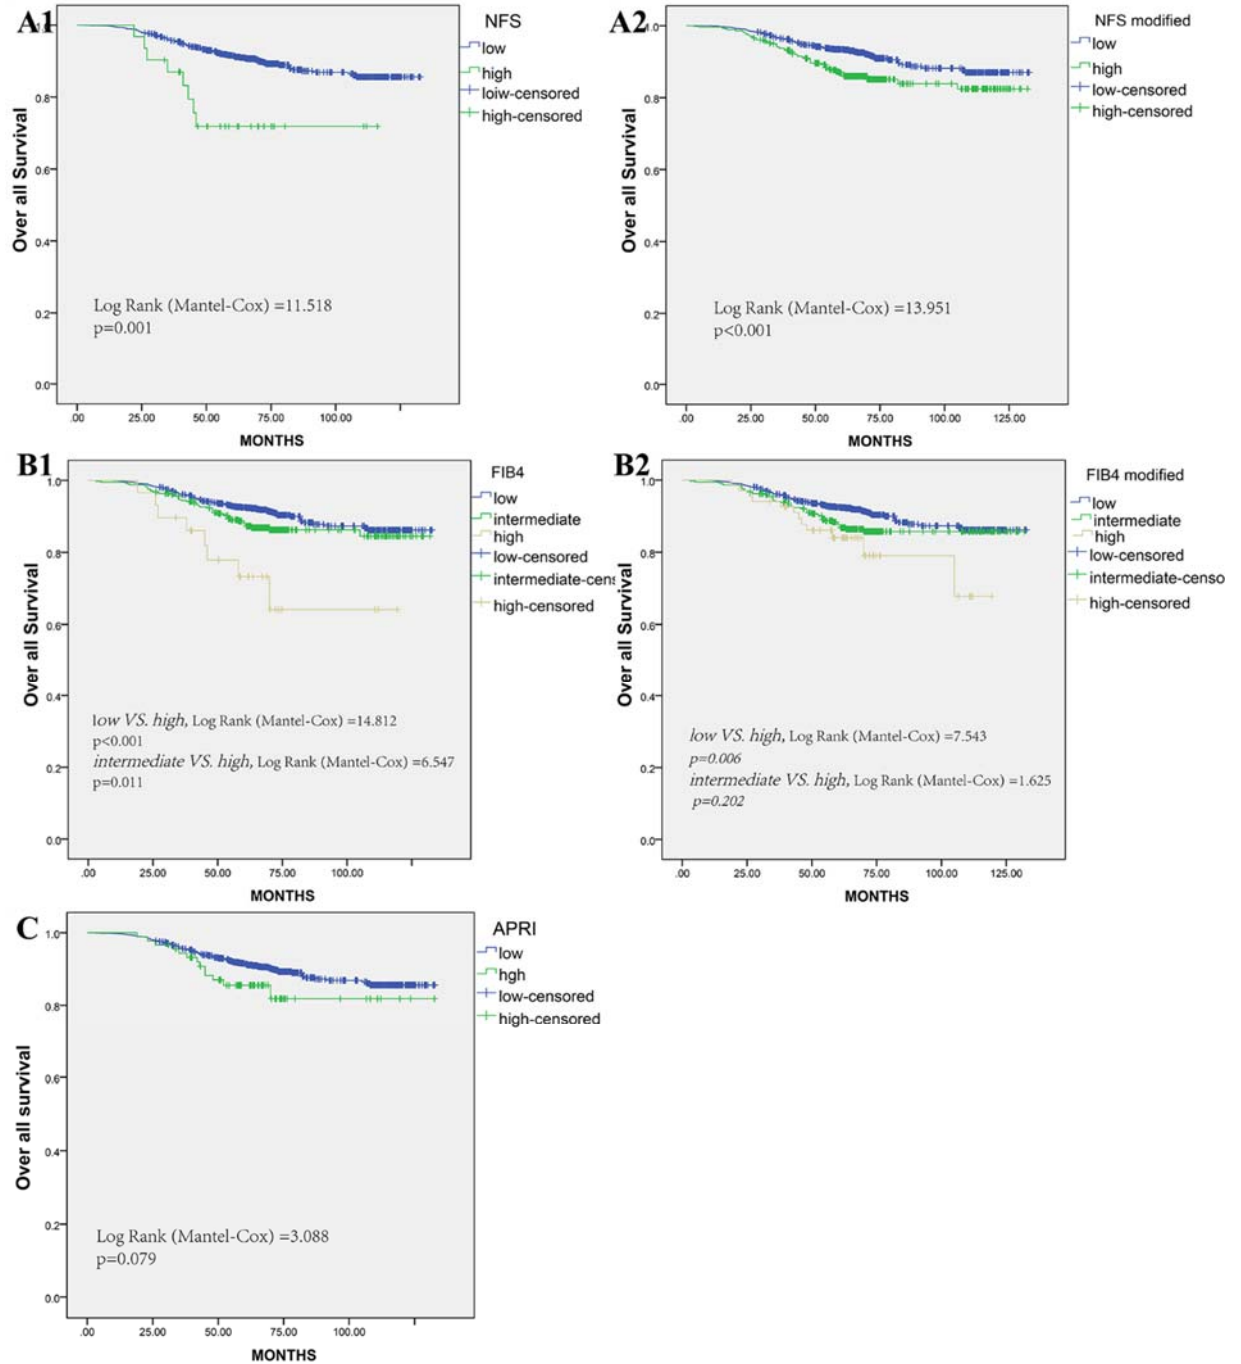

**Figure S2. Clinicopathologic factors measured by Kaplan-Meier survival for DFS and OS in the discovery cohort.**

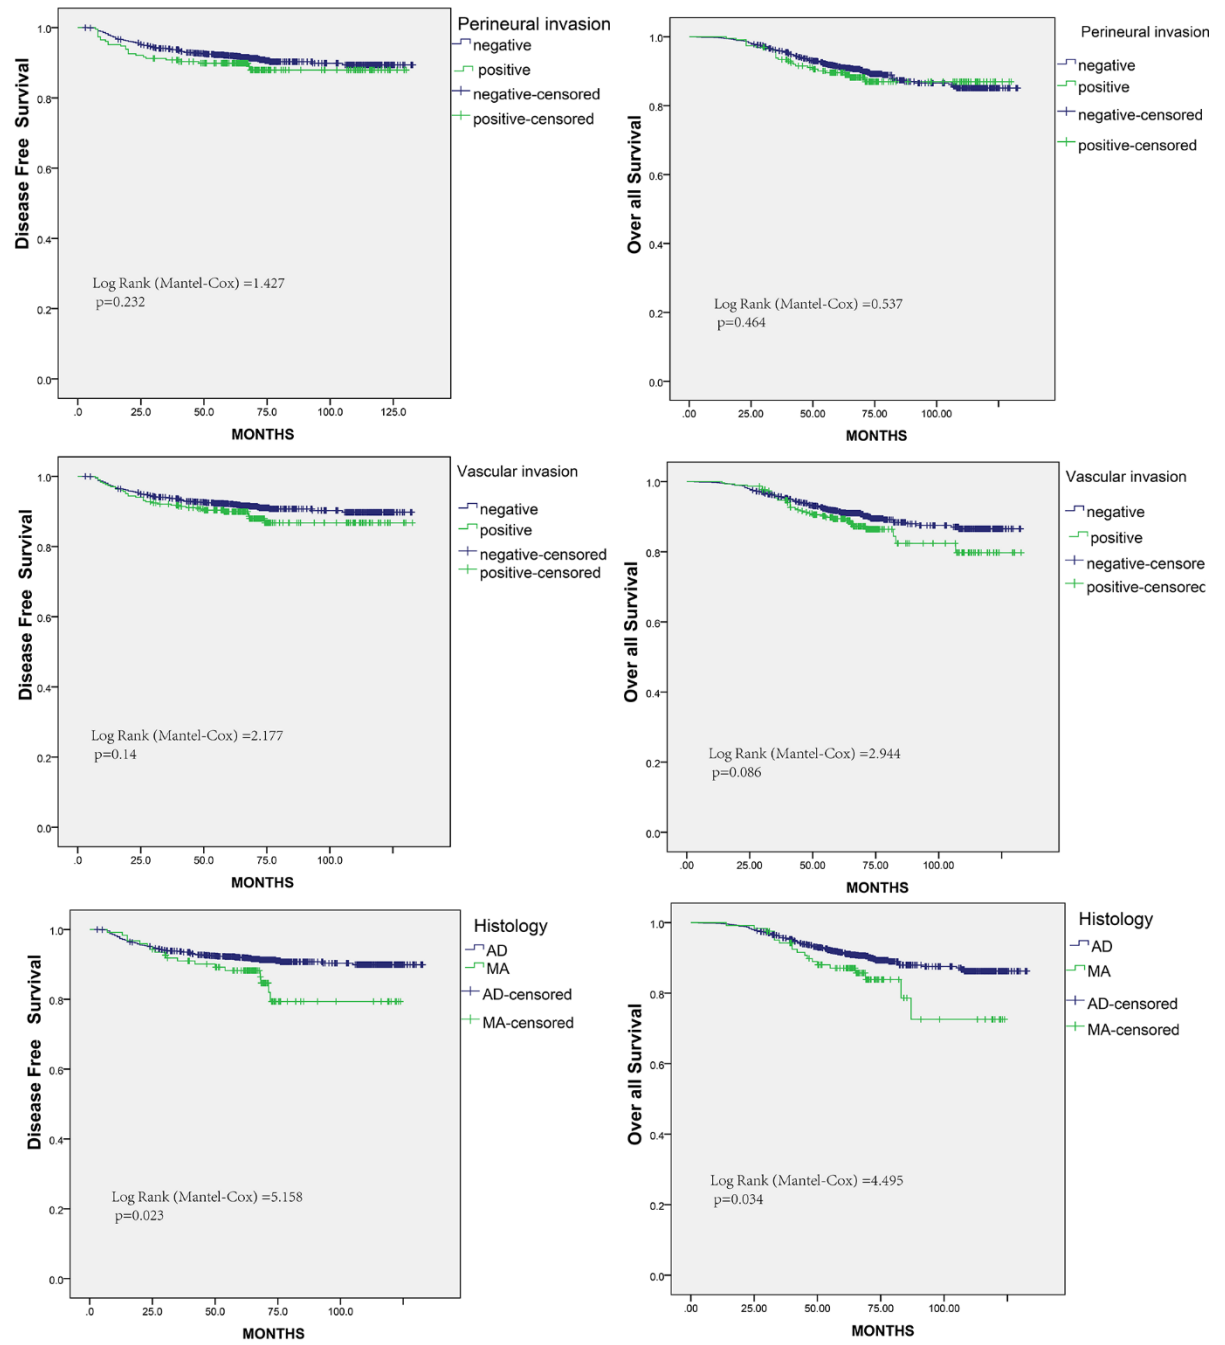

**Figure S3. TNM stage measured by Kaplan-Meier survival for DFS and OS in the discovery cohort, along with the assessment of AUC.**

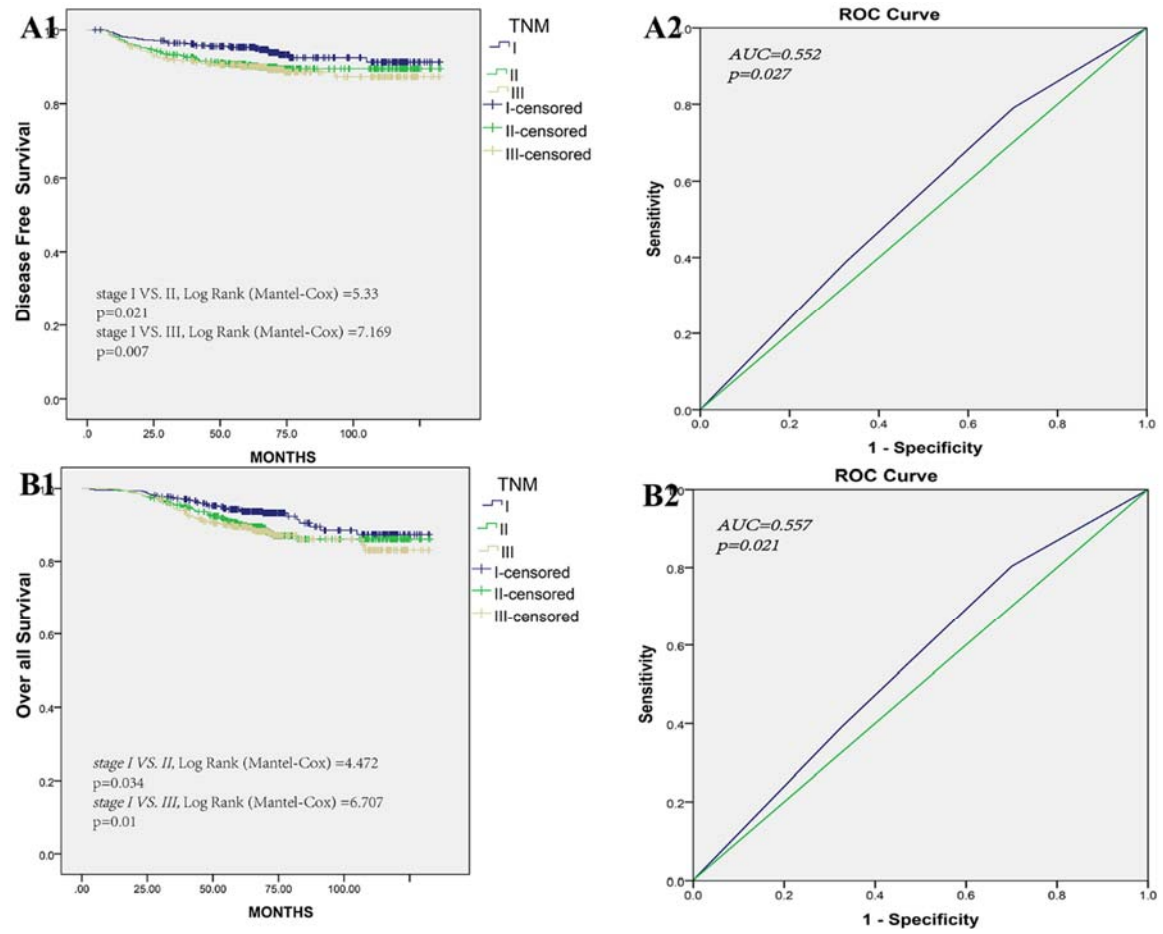

Figure S4. Distribution of liver fibrosis score, liver metastasis and survival statuses in discovery cohort.

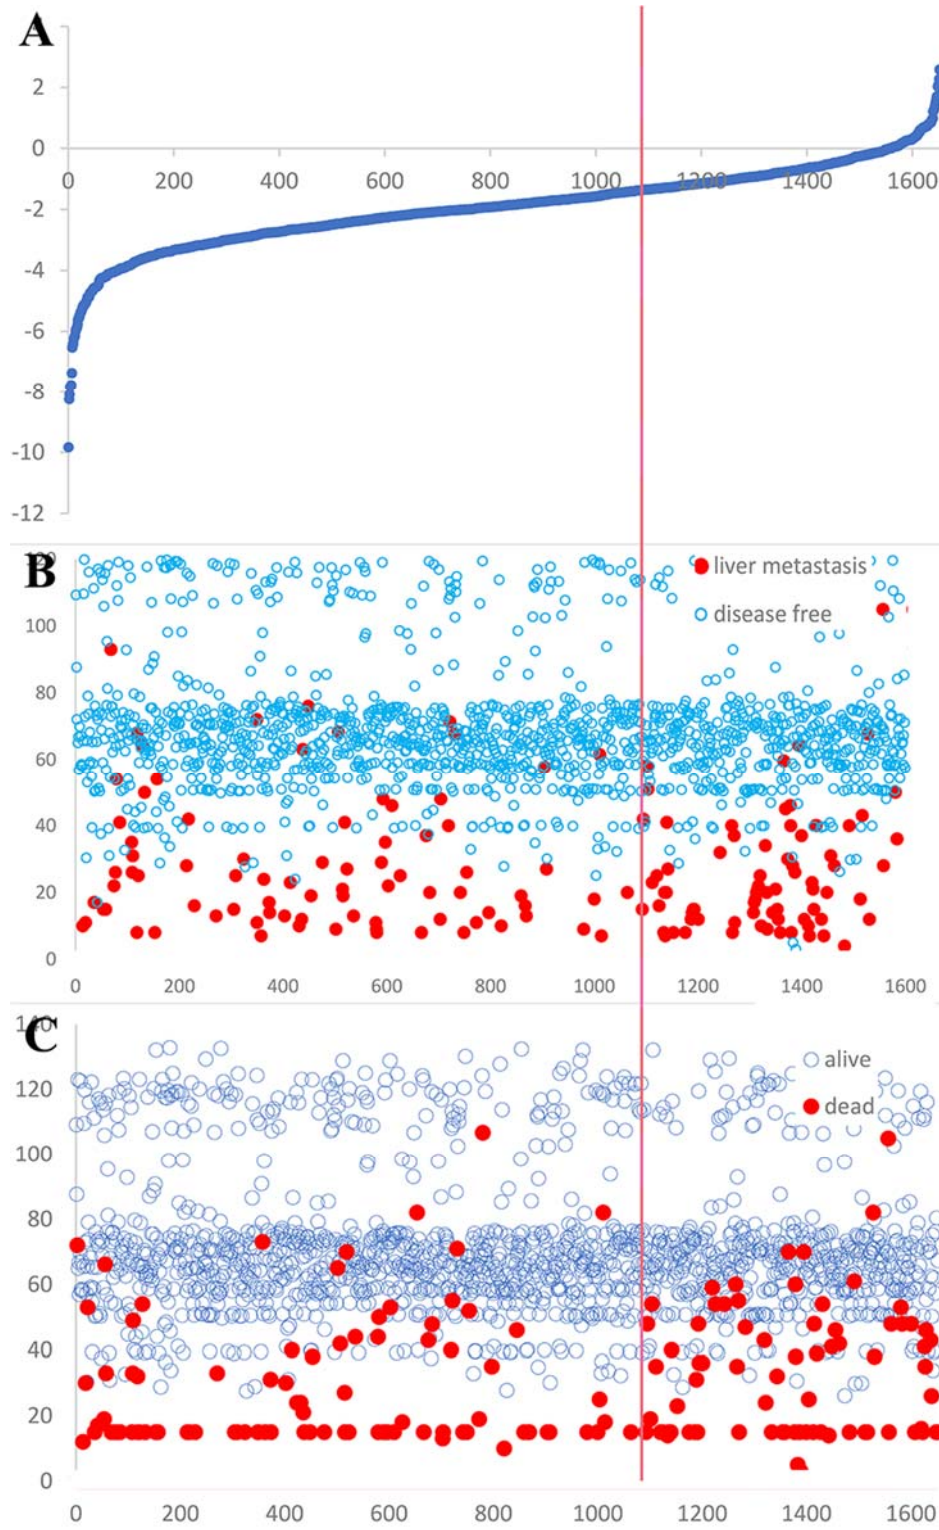

**Figure S5. The role liver fibrosis score in the liver metastasis stratified by TNM stage.**

A1: NFS in stage I + II, A2: NFS in stage III; B1: FIB4 in stage I + II, B2: FIB4 in stage III;

C1: APRI in stage I + II, C2: APRI in stage III.

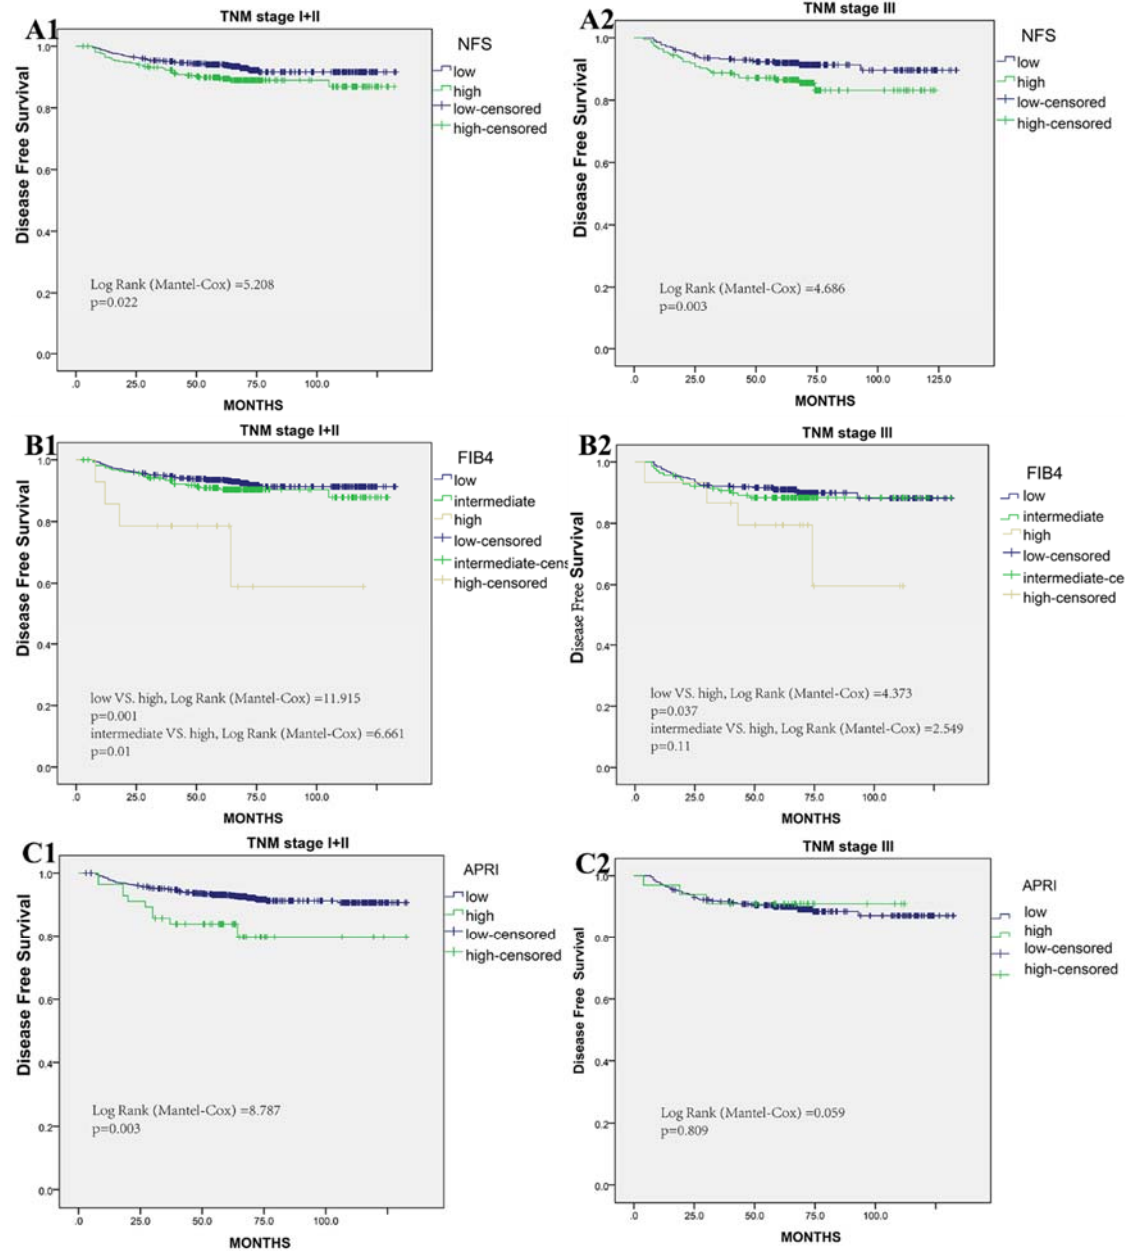

**Figure S6. Construction of liver fibrosis score nomogram to estimate OS in the discovery cohort, along with the assessment of the model calibration.**

A1: NFS nomogram, A2: Calibration curves for NFS; B1: FIB4 nomogram, B2: Calibration curves for FIB4; C1: APRI nomogram, C2: Calibration curves for APRI;

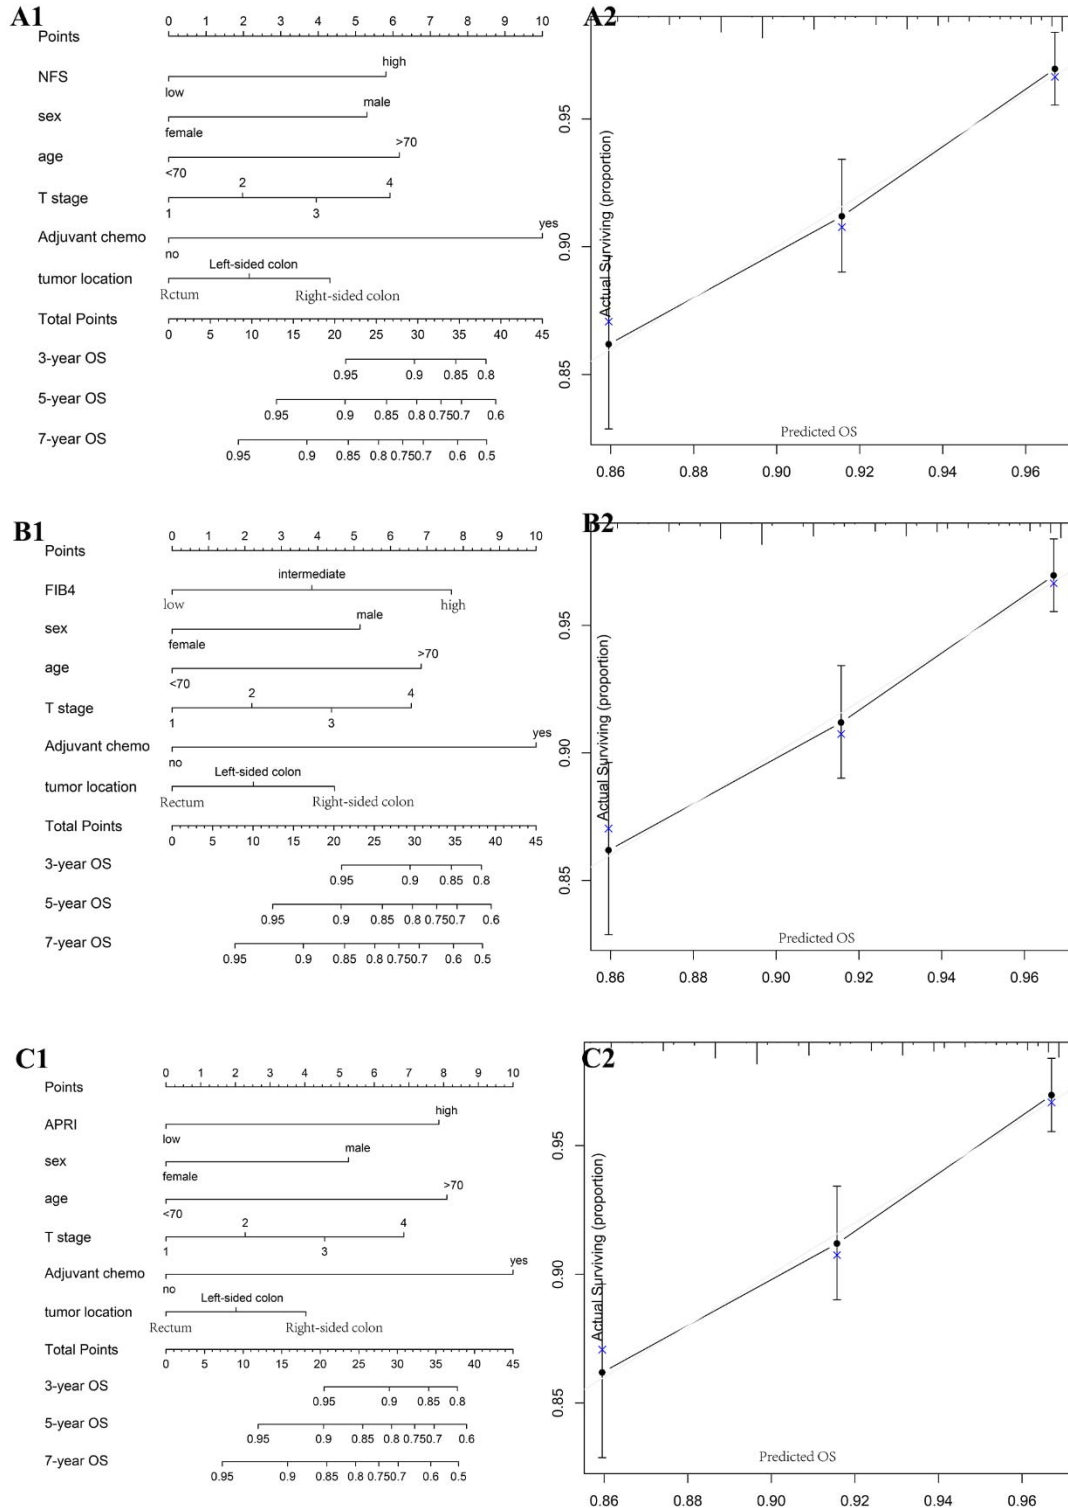

**Figure S7. Clinicopathologic nomograms for DFS and OS only using clinicopathologic risk factors in the discovery cohort, along with the assessment of the model calibration.**

A1: Clinicopathologic nomogram for DFS, A2: Calibration curves for DFS; B1: Clinicopathologic nomogram for OS, B2: Calibration curves for OS;

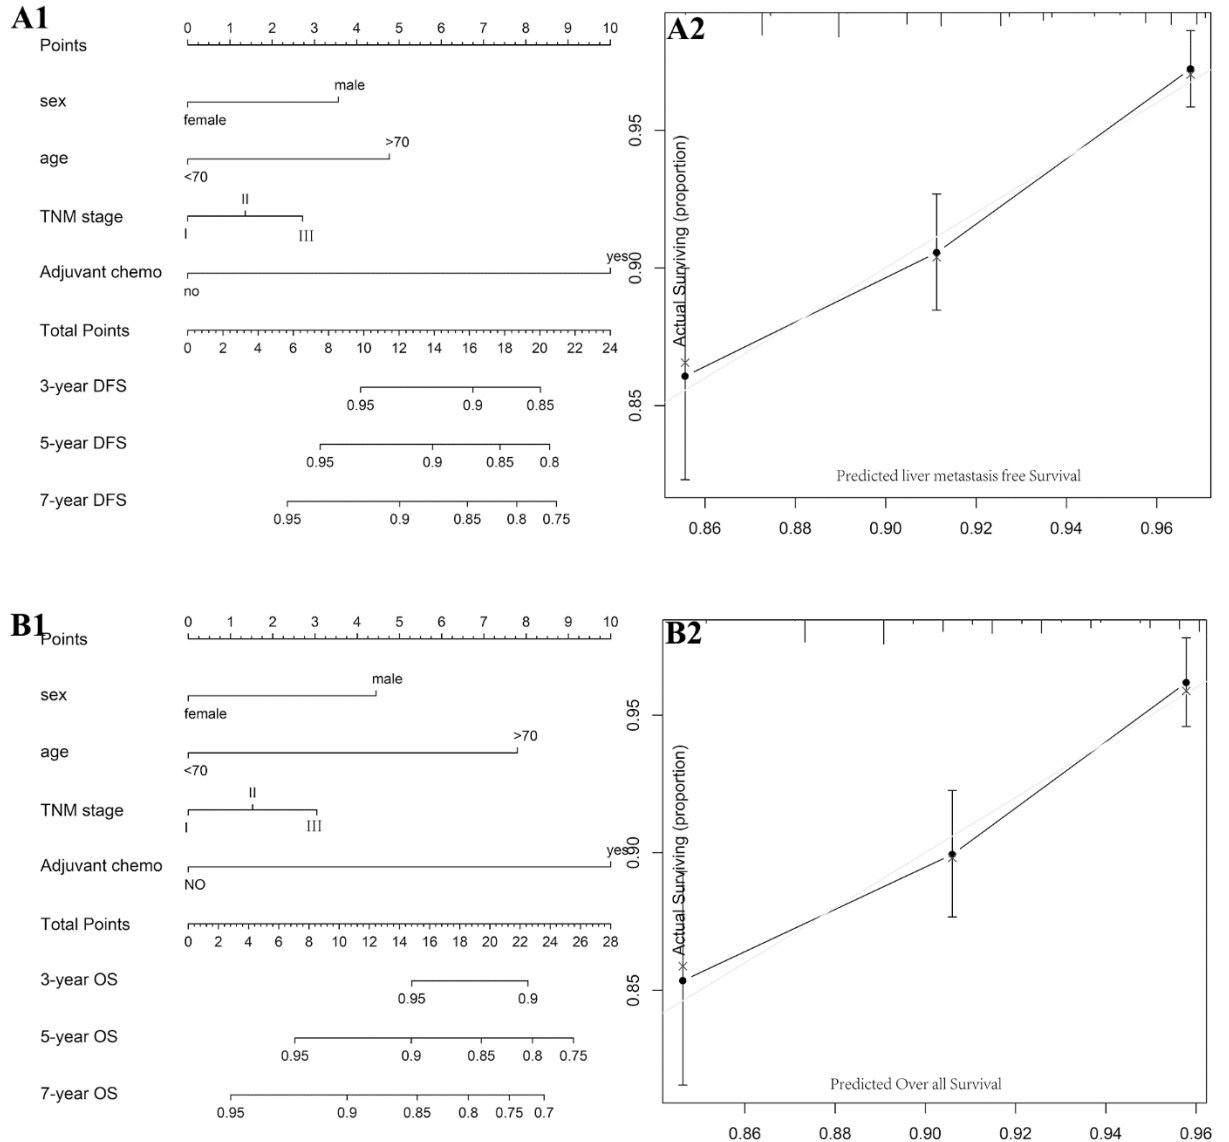

**Figure S8. Prediction error curves for each model for stratifying liver DFS and OS in the discovery cohort.**

A1: Prediction error curves of the NFS, FIB4 and APRI score for DFS. A2: Prediction error curves of liver fibrosis and Clinicopathologic nomogram for DFS. B1: Prediction error curves of the NFS, FIB4 and APRI score for OS. A2: Prediction error curves of liver fibrosis and Clinicopathologic nomogram for OS. Lower prediction errors indicate higher model accuracy.

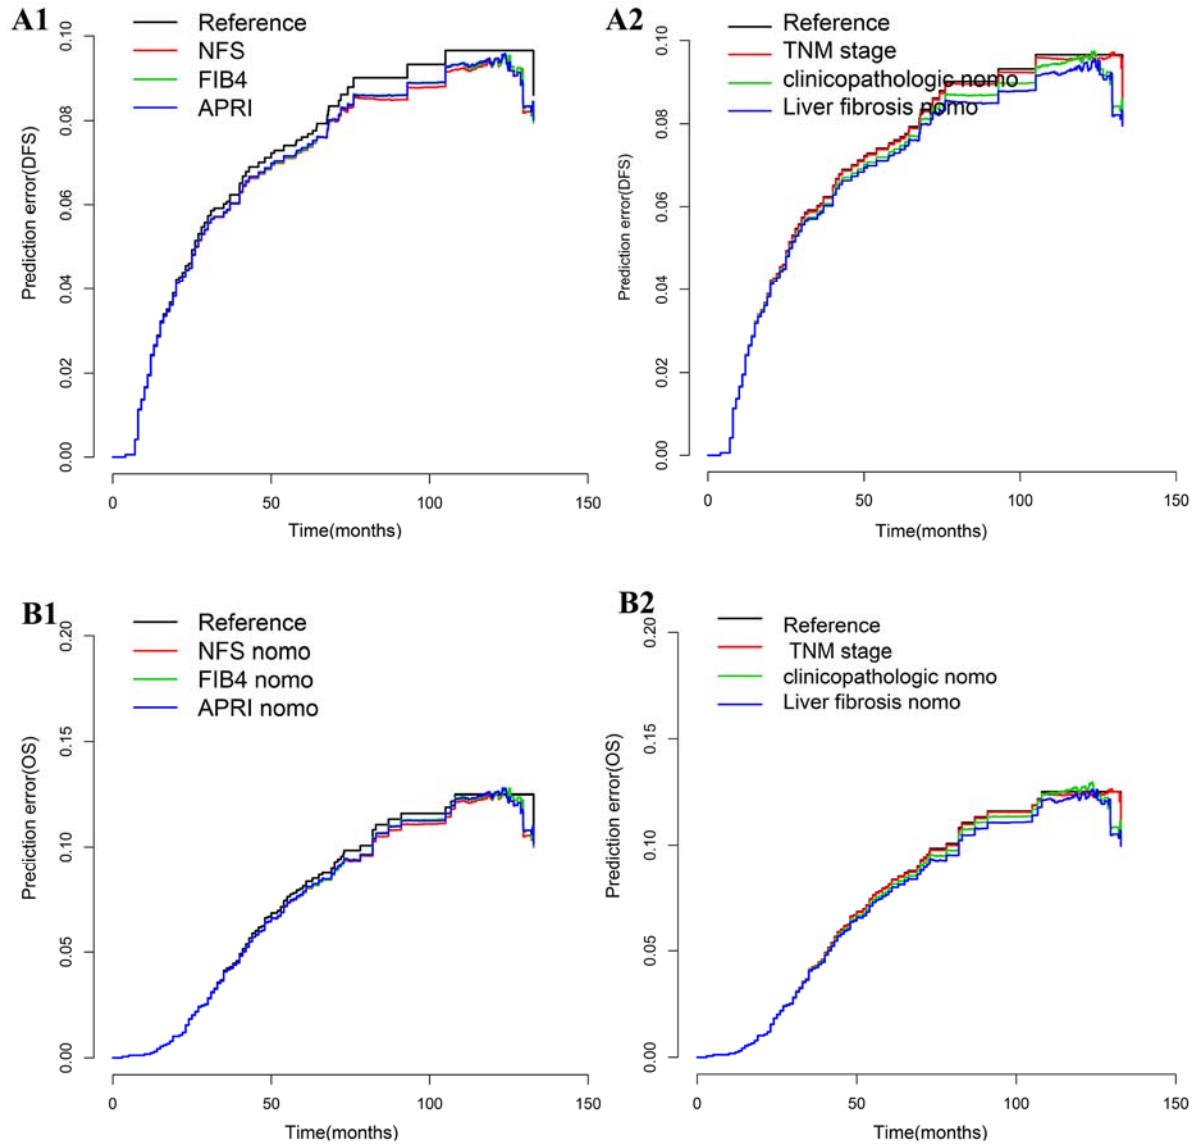



**Figure S9. nomograms for DFS and OS using conventional clinical metrics in the discovery cohort, along with the assessment of the model calibration.**

A1: conventional clinical metrics nomogram for DFS, A2: Calibration curves for DFS; B1: conventional clinical metrics nomogram for OS, B2: Calibration curves for OS;

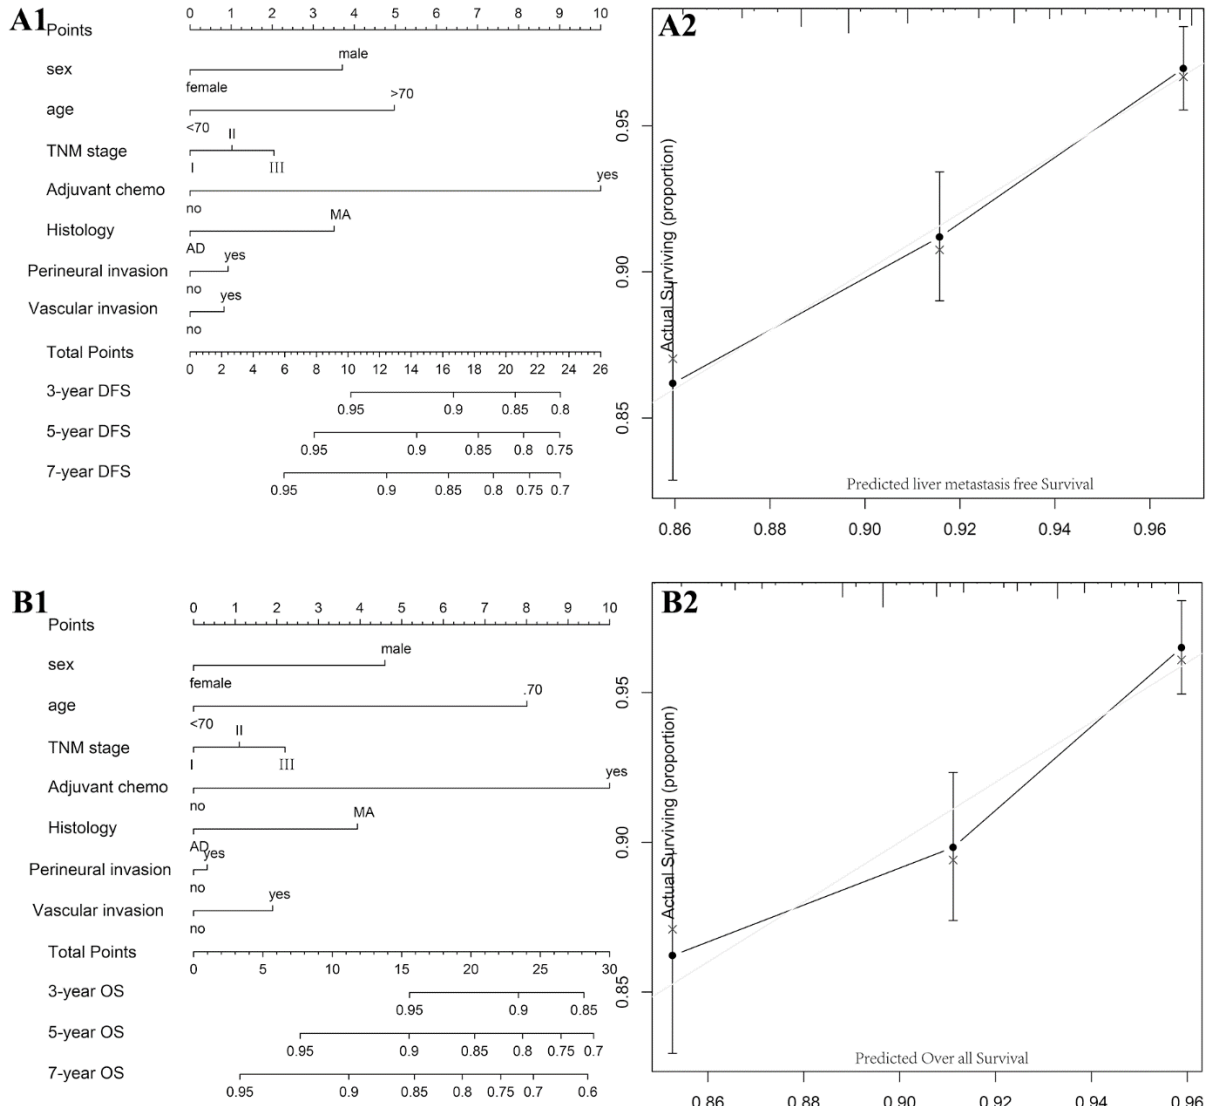

**Figure S10. Liver fibrosis score and CRS measured by ROC curves for hepatic RFS and OS in the validation cohort.**

AUC: area under the curve; ROC: receiver operator characteristic. Liver fibrosis score outperformed the CRS.

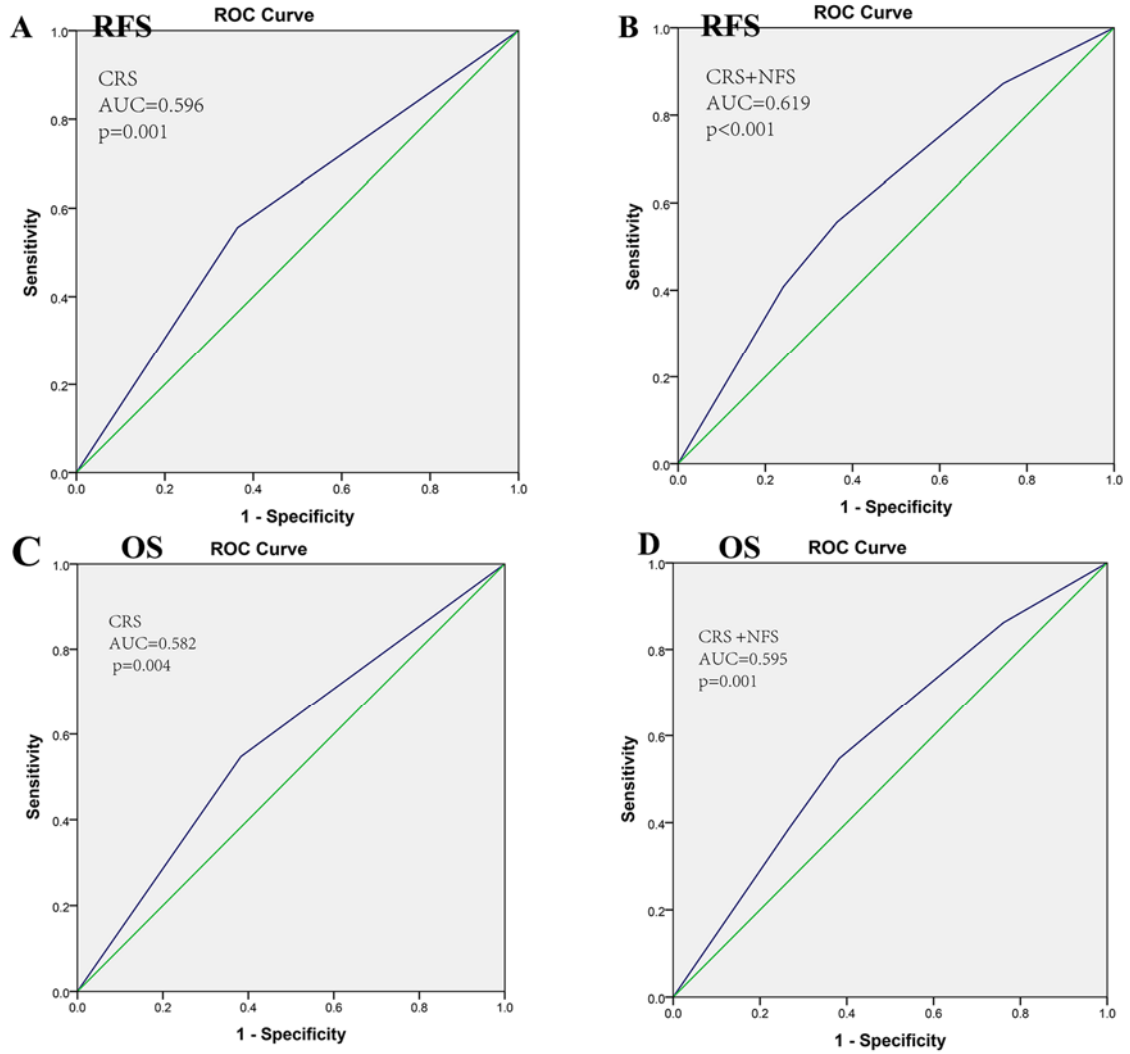

Supplement: 40169_2020_264_MOESM1_ESM.pdf [file 40169_2020_264_MOESM1_ESM.pdf]
